# Supplementary material
Source: HighWire-hosted journal article supplement (https://tobaccocontrol.bmj.com/content/33/2/221)
Supplement: inline-supplementary-material-1 [file inline-supplementary-material-1.pdf]

## Supplementary material

**Table S1:** Independent associations between support for tobacco availability policies and sociodemographic and smoking status characteristics in Great Britain – excluding those responding with “Don’t know/Unsure”.

| Variable                     | Tobacco-free generation (N=1981) |                     |              | Tobacco 21 (N=2027) |                     |              | Retail license (N=2028) |                     |                  | Reducing retailers (n=1997) |                     |                  | Restricting sale near schools (N=2023) |                     |              |
|------------------------------|----------------------------------|---------------------|--------------|---------------------|---------------------|--------------|-------------------------|---------------------|------------------|-----------------------------|---------------------|------------------|----------------------------------------|---------------------|--------------|
|                              | OR <sup>a</sup>                  | 95% CI <sup>a</sup> | P            | OR <sup>a</sup>     | 95% CI <sup>a</sup> | P            | OR <sup>a</sup>         | 95% CI <sup>a</sup> | P                | OR <sup>a</sup>             | 95% CI <sup>a</sup> | P                | OR <sup>a</sup>                        | 95% CI <sup>a</sup> | P            |
| <b>Age (years)</b>           | 1.02                             | 0.97, 1.08          | 0.44         | 1.07                | 1.01, 1.12          | <b>0.019</b> | 0.86                    | 0.78, 0.94          | <b>&lt;0.001</b> | 1.00                        | 0.95, 1.05          | 0.98             | 0.99                                   | 0.94, 1.05          | 0.78         |
| <b>Sex</b>                   |                                  |                     |              |                     |                     |              |                         |                     |                  |                             |                     |                  |                                        |                     |              |
| Other                        | —                                | —                   |              | —                   | —                   |              | —                       | —                   |                  | —                           | —                   |                  | —                                      | —                   |              |
| Women                        | 0.99                             | 0.82, 1.19          | 0.9          | 1.26                | 1.06, 1.50          | <b>0.009</b> | 1.31                    | 0.97, 1.77          | 0.081            | 1.39                        | 1.16, 1.66          | <b>&lt;0.001</b> | 1.19                                   | 0.98, 1.45          | 0.076        |
| <b>Social grade</b>          |                                  |                     |              |                     |                     |              |                         |                     |                  |                             |                     |                  |                                        |                     |              |
| ABC1                         | —                                | —                   |              | —                   | —                   |              | —                       | —                   |                  | —                           | —                   |                  | —                                      | —                   |              |
| C2DE                         | 1.24                             | 1.02, 1.50          | <b>0.034</b> | 1.10                | 0.91, 1.32          | 0.32         | 0.86                    | 0.64, 1.18          | 0.36             | 0.97                        | 0.80, 1.17          | 0.72             | 0.89                                   | 0.73, 1.09          | 0.27         |
| <b>Children in household</b> |                                  |                     |              |                     |                     |              |                         |                     |                  |                             |                     |                  |                                        |                     |              |
| No                           | —                                | —                   |              | —                   | —                   |              | —                       | —                   |                  | —                           | —                   |                  | —                                      | —                   |              |
| Yes                          | 1.21                             | 0.97, 1.52          | 0.088        | 1.02                | 0.83, 1.26          | 0.85         | 0.94                    | 0.65, 1.39          | 0.76             | 1.05                        | 0.84, 1.30          | 0.68             | 1.11                                   | 0.87, 1.41          | 0.40         |
| <b>Urban/rural</b>           |                                  |                     |              |                     |                     |              |                         |                     |                  |                             |                     |                  |                                        |                     |              |
| Urban                        | —                                | —                   |              | —                   | —                   |              | —                       | —                   |                  | —                           | —                   |                  | —                                      | —                   |              |
| Rural                        | 1.01                             | 0.81, 1.25          | 0.92         | 1.11                | 0.91, 1.36          | 0.31         | 0.98                    | 0.70, 1.40          | 0.92             | 1.09                        | 0.89, 1.35          | 0.40             | 1.04                                   | 0.83, 1.31          | 0.73         |
| <b>Smoking status</b>        |                                  |                     |              |                     |                     |              |                         |                     |                  |                             |                     |                  |                                        |                     |              |
| Never smoker                 | —                                | —                   |              | —                   | —                   |              | —                       | —                   |                  | —                           | —                   |                  | —                                      | —                   |              |
| Ex-smoker                    | 0.72                             | 0.58, 0.89          | <b>0.003</b> | 0.85                | 0.70, 1.04          | 0.12         | 0.87                    | 0.62, 1.24          | 0.43             | 0.85                        | 0.70, 1.05          | 0.13             | 0.72                                   | 0.58, 0.91          | <b>0.005</b> |

| Variable | Tobacco-free generation<br>(N=1981) |                     |                  | Tobacco 21 (N=2027) |                     |              | Retail license (N=2028) |                     |              | Reducing retailers (n=1997) |                     |                  | Restricting sale near schools<br>(N=2023) |                     |                  |
|----------|-------------------------------------|---------------------|------------------|---------------------|---------------------|--------------|-------------------------|---------------------|--------------|-----------------------------|---------------------|------------------|-------------------------------------------|---------------------|------------------|
|          | OR <sup>a</sup>                     | 95% CI <sup>a</sup> | P                | OR <sup>a</sup>     | 95% CI <sup>a</sup> | P            | OR <sup>a</sup>         | 95% CI <sup>a</sup> | P            | OR <sup>a</sup>             | 95% CI <sup>a</sup> | P                | OR <sup>a</sup>                           | 95% CI <sup>a</sup> | P                |
| Smoker   | 0.41                                | 0.41, 0.56          | <b>&lt;0.001</b> | 0.70                | 0.53, 0.91          | <b>0.008</b> | 0.51                    | 0.34, 0.78          | <b>0.002</b> | 0.32                        | 0.23, 0.42          | <b>&lt;0.001</b> | 0.38                                      | 0.29, 0.50          | <b>&lt;0.001</b> |

<sup>a</sup>OR = Odds Ratio, CI = Confidence Interval

**Table S2:** Associations between support for tobacco availability policies and length of abstinence (in 10 year increments) among ex-smokers

| Variable                               | Tobacco-free generation (N=549) |                     |      | Tobacco 21 (N=549) |                     |      | Retail license (N=549) |                     |      | Reducing retailers (N=549) |                     |       | Restricting sale near schools (N=549) |                     |      |
|----------------------------------------|---------------------------------|---------------------|------|--------------------|---------------------|------|------------------------|---------------------|------|----------------------------|---------------------|-------|---------------------------------------|---------------------|------|
|                                        | OR <sup>a</sup>                 | 95% CI <sup>a</sup> | P    | OR <sup>a</sup>    | 95% CI <sup>a</sup> | P    | OR <sup>a</sup>        | 95% CI <sup>a</sup> | P    | OR <sup>a</sup>            | 95% CI <sup>a</sup> | P     | OR <sup>a</sup>                       | 95% CI <sup>a</sup> | P    |
| <b>Years quit (10-year increments)</b> | 1.16                            | 0.99, 1.35          | 0.07 | 1.06               | 0.91, 1.22          | 0.47 | 1.11                   | 0.89, 1.39          | 0.36 | 1.23                       | 1.06, 1.43          | 0.006 | 1.12                                  | 0.95, 1.31          | 0.17 |

<sup>a</sup>OR = Odds Ratio, CI = Confidence Interval; Models adjusted for age, sex, social grade, urbanity and children in the household

**Table S3:** Full breakdown of response options for support for tobacco availability policies in Great Britain (Weighted N = 2,013)

| Policy                                                                                                                     | Strongly support | Tend to support | No opinion either way | Tend to oppose | Strongly oppose | Unsure/don't know |
|----------------------------------------------------------------------------------------------------------------------------|------------------|-----------------|-----------------------|----------------|-----------------|-------------------|
| Ban the sale of cigarettes and tobacco products to everyone born after a certain year from 2030 onwards                    | 21.69%           | 12.84%          | 20.39%                | 18.17%         | 23.16%          | 3.75%             |
| Raising the legal age of sale of cigarettes and tobacco from 18 to 21                                                      | 35.55%           | 13.66%          | 19.01%                | 15.62%         | 15.10%          | 1.06%             |
| Requiring anyone selling tobacco to have a licence which can be removed if they sell to those under-age                    | 76.21%           | 13.44%          | 4.68%                 | 1.54%          | 3.23%           | 0.91%             |
| Reducing the number of retailers selling cigarettes and tobacco in neighbourhoods with a high density of tobacco retailers | 29.43%           | 17.06%          | 27.39%                | 11.20%         | 12.11%          | 2.81%             |
| Restricting the sale of cigarettes and tobacco in close proximity to schools                                               | 54.68%           | 15.21%          | 14.65%                | 6.61%          | 7.69%           | 1.16%             |

Unweighted N = 2,197

**Table S4:** Independent associations (unweighted) between support for tobacco availability policies and smoking and quitting characteristics among past-year smokers in Great Britain

| Variable                      | Tobacco-free generation |                 |                     | Tobacco 21 |                 |                     | Retail license |                 |                     | Reducing retailers |                 |                     | Restricting sale near schools |                 |                     |
|-------------------------------|-------------------------|-----------------|---------------------|------------|-----------------|---------------------|----------------|-----------------|---------------------|--------------------|-----------------|---------------------|-------------------------------|-----------------|---------------------|
|                               | % support               | OR <sup>a</sup> | 95% CI <sup>a</sup> | % support  | OR <sup>a</sup> | 95% CI <sup>a</sup> | % support      | OR <sup>a</sup> | 95% CI <sup>a</sup> | % support          | OR <sup>a</sup> | 95% CI <sup>a</sup> | % support                     | OR <sup>a</sup> | 95% CI <sup>a</sup> |
| <b>MTSS</b>                   |                         |                 |                     |            |                 |                     |                |                 |                     |                    |                 |                     |                               |                 |                     |
| Low                           | 18%                     | —               | —                   | 40%        | —               | —                   | 83%            | —               | —                   | 23%                | —               | —                   | 50%                           | —               | —                   |
| High                          | <b>41%</b>              | <b>3.45**</b>   | <b>1.68, 7.14</b>   | 61%        | 1.96            | 1.00, 3.88          | 90%            | 1.91            | 0.72, 6.06          | <b>43%</b>         | <b>2.60*</b>    | <b>1.29, 5.27</b>   | 61%                           | 1.52            | 0.78, 3.01          |
| <b>Past year quit attempt</b> |                         |                 |                     |            |                 |                     |                |                 |                     |                    |                 |                     |                               |                 |                     |
| No                            | 19%                     | —               | —                   | 39%        | —               | —                   | 85%            | —               | —                   | 26%                | —               | —                   | 52%                           | —               | —                   |
| Yes                           | 25%                     | 1.02            | 0.52, 1.95          | 47%        | 1.53            | 0.89, 2.62          | 84%            | 0.73            | 0.36, 1.55          | 30%                | 0.89            | 0.47, 1.63          | 55%                           | 1.00            | 0.58, 1.71          |
| <b>SUTS</b>                   |                         |                 |                     |            |                 |                     |                |                 |                     |                    |                 |                     |                               |                 |                     |
| None                          | 19%                     | —               | —                   | 40%        | —               | —                   | 84%            | —               | —                   | 27%                | —               | —                   | 57%                           | —               | —                   |
| Slight-moderate               | 20%                     | 0.79            | 0.36, 1.87          | 40%        | 1.21            | 0.61, 2.47          | 85%            | 0.93            | 0.33, 2.32          | 27%                | 1.00            | 0.47, 2.23          | 51%                           | 0.98            | 0.50, 1.90          |
| Strong                        | 27%                     | 1.12            | 0.46, 2.83          | 51%        | 1.71            | 0.79, 3.78          | 84%            | 0.74            | 0.24, 2.09          | 30%                | 1.26            | 0.54, 3.04          | 57%                           | 1.22            | 0.58, 2.60          |

<sup>a</sup>OR = Odds Ratio, CI = Confidence Interval  
N = 291

**Table S5:** Independent associations between support for tobacco availability policies and smoking and quitting characteristics among past-year smokers in Great Britain

| Variable                      | Tobacco-free generation |                     |                  | Tobacco 21      |                     |       | Retail license  |                     |              | Reducing retailers |                     |              | Restricting sale near schools |                     |      |
|-------------------------------|-------------------------|---------------------|------------------|-----------------|---------------------|-------|-----------------|---------------------|--------------|--------------------|---------------------|--------------|-------------------------------|---------------------|------|
|                               | OR <sup>a</sup>         | 95% CI <sup>a</sup> | P                | OR <sup>a</sup> | 95% CI <sup>a</sup> | P     | OR <sup>a</sup> | 95% CI <sup>a</sup> | P            | OR <sup>a</sup>    | 95% CI <sup>a</sup> | P            | OR <sup>a</sup>               | 95% CI <sup>a</sup> | P    |
| <b>MTSS</b>                   |                         |                     |                  |                 |                     |       |                 |                     |              |                    |                     |              |                               |                     |      |
| Low                           | —                       | —                   |                  | —               | —                   |       | —               | —                   |              | —                  | —                   |              | —                             | —                   |      |
| High                          | 3.84                    | 1.77, 8.40          | <b>&lt;0.001</b> | 1.78            | 0.87, 3.65          | 0.11  | 1.79            | 0.65, 5.90          | 0.30         | 3.23               | 1.52, 6.91          | <b>0.002</b> | 1.62                          | 0.79, 3.41          | 0.19 |
| <b>Past year quit attempt</b> |                         |                     |                  |                 |                     |       |                 |                     |              |                    |                     |              |                               |                     |      |
| No                            | —                       | —                   |                  | —               | —                   |       | —               | —                   |              | —                  | —                   |              | —                             | —                   |      |
| Yes                           | 0.92                    | 0.44, 1.85          | 0.82             | 1.72            | 0.97, 3.06          | 0.063 | 0.74            | 0.34, 1.66          | 0.45         | 0.79               | 0.40, 1.53          | 0.50         | 0.89                          | 0.50, 1.58          | 0.68 |
| <b>HSI</b>                    |                         |                     |                  |                 |                     |       |                 |                     |              |                    |                     |              |                               |                     |      |
| Low-moderate                  | —                       | —                   |                  | —               | —                   |       | —               | —                   |              | —                  | —                   |              | —                             | —                   |      |
| High                          | 0.64                    | 0.23, 1.58          | 0.37             | 0.81            | 0.38, 1.65          | 0.56  | 0.36            | 0.16, 0.83          | <b>0.013</b> | 0.59               | 0.22, 1.36          | 0.24         | 0.62                          | 0.31, 1.25          | 0.18 |

<sup>a</sup>OR = Odds Ratio, CI = Confidence Interval
